# Supplementary material for: Evaluation of Maternal Genetic Background of Two Hungarian Autochthonous Sheep Breeds Coming from Different Geographical Directions
Source: MDPI journal article supplement (doi:10.3390/ani12030218), 2022-01-18
Supplement: s1 [file s1]

### Number of polymorphic sites

**Table S1.** Sample size and number of polymorphic positions for CYTB and CR

| Parameter                                  | Tsigai | Cikta               | total               |
|--------------------------------------------|--------|---------------------|---------------------|
| Number of individuals/sequences            |        |                     |                     |
| CYTB                                       | 134    | 68                  | 202                 |
| CR                                         | 130    | 69                  | 199                 |
| Number of polymorphic sites/mutations      |        |                     |                     |
| CYTB                                       | 35     | 21                  | 56                  |
| CR                                         | 162    | 108                 | 270                 |
| Average number of mutations per individual |        |                     |                     |
| CYTB                                       | 0.261  | 0.309 <sup>NS</sup> | 0.277 <sup>NS</sup> |
| CR                                         | 1.246  | 1.565 <sup>NS</sup> | 1.357               |

It can be seen that the number of mutations observed shows a positive relationship with the number of individuals included in the study. But the average number of mutations per individuals is inversely proportional to the sample size according to the breeds. Their values did not result in significant difference between breeds neither for CYTB (one-sided difference test between proportions,  $p = 0.476$ , NS) nor for CR ( $p = 0.427$ , NS). The 5-fold difference in the individual mutation rates of the two sequences in favor of CR either was not statistically significant ( $p = 0.160$ , NS).
