# Supplementary material for: Evaluation of Maternal Genetic Background of Two Hungarian Autochthonous Sheep Breeds Coming from Different Geographical Directions
Source: MDPI journal article supplement (doi:10.3390/ani12030218), 2022-01-18
Supplement: s1 [file s1]

## Details of primers and PCRs

**Table S1.** Primers for CYTB and CR

| Marker | Position   | Primer sequences 5'-3'    | Reference             |
|--------|------------|---------------------------|-----------------------|
| CYTB   | Forw-14159 | TCATCATCATTCTCACATGGAATC  | Meadows et al. [1]    |
|        | Rev-15298  | CTCCTTCTCTGGTTTACAAGACCAG |                       |
| CR     | Forw-15400 | ACACCCAAAGCTGAAGTTCTAC    | Gáspárdy et al. [2]   |
|        | Rev-16087  | GTTGGTTTCACGCGGCATGGT     |                       |
|        | Forw-15983 | AACTGCTTGACCGTACATAGTA    | Hiendleder et al. [3] |
|        | Rev-592    | AGAAGGGTATAAAGCACCGCC     |                       |

A primer pair designed for the cytochrome b coding region (14,159–15,298) after Meadows et al. [1] consisted of CYTB-F 5'-GTCATCATCATTCTCACATGGAATC-3' and CYTB-R 5'-CTCCTTCTCTGGTTTACAAGACCAG-3' and applied following the amplification protocol presented here: an initial cycle of 94°C for 30 s, 6 cycles of 30 s at 94°C, 30 s at 54°C, 45 s at 72°C, 6 cycles of 30 s at 94°C, 30 s at 53°C, 45 s at 72°C, 21 cycles of 30 s at 94°C, 30 s at 52°C, 45 s at 72°C; and a final extension step 72°C for 7 min.

Two primer pairs were applied to amplify the sequence of control region: a first pair for the beginning of the region as described by Gáspárdy et al. [2] and a second pair as described by Hiendleder et al. [3].

First, the following amplification protocol was used for the newly designed primers (MtOA\_F15400 5'-ACACCCAAAGCTGAAGTTCTAC-3' and MtOA\_R16087 5'-GTTGGTTTCACGCGGCATGGT-3'): an initial cycle of 94°C for 20 s, followed by 34 cycles of 94°C for 30 s, 62°C for 30 s, 72°C 45 s, and a final extension step 72°C for 7 min. The expected PCR product size was 688 bp. The second amplification protocol was used as follows (MtOA\_F15983 5'-AACTGCTTGACCGTACATAGTA-3' and MtOA\_R592 5'-AGAAGGGTATAAAGCACCGCC-3'): an initial cycle of 94°C for 30 s, 6 cycles of 30 s at 94°C, 30 s at 54°C, 45 s at 72°C, 6 cycles of 30 s at 94°C, 30 s at 53°C, 45 s at 72°C, 21 cycles of 30 s at 94°C, 30 s at 52°C, 45 s at 72°C; and a final extension step 72°C for 7 min. Aligned and trimmed CR sequences corresponded to positions 15437–16616 on the reference sequence (AF010406 [3]).

**Table S2.** Composition of the PCR mixture.

| Reagent                          | Amount                     |
|----------------------------------|----------------------------|
| DreamTaq™ Green PCR Master Mix   | 5 µl                       |
| Primer mix (forward and reverse) | 1-1 µl (10 µM)             |
| DNA                              | 1-10 µl (approx. 10 ng/µl) |
| BSA (Bovine Serum Albumin)       | 1µl (20 mg/ml)             |
| PCR grade water                  | to volume                  |
| Total volume                     | 25 µl                      |

## References

1. Meadows, J.R.S.; Li, K.; Kantanen, J.; Tapio, M.; Sipos, W.; Pardeshi, V.; Gupta, V.; Calvo, J.H.; Whan, V.; Norris, B.; Kijas, J.W. Mitochondrial sequence reveals high levels of gene flow between sheep breeds from Asia and Europe. *J Hered* **2005**, *96*, 494–501. DOI: 10.1093/jhered/esi100
2. Gáspárdy, A.; Berger, B.; Zabavnik-Piano, J.; Kovács, E.; Annus, K.; Zenke, P.; Sáfár, L.; Maróti-Agóts, Á. Comparison of mtDNA control region among descendant breeds of the extinct Zaupel sheep revealed haplogroup C and D in Central Europe. *Vet Med Sci* **2021**, First published: 22 July 2021. DOI: 10.1002/vms3.585
3. Hiendleder, S.; Lewalski, H.; Wassmuth, R.; Janke, A. The Complete Mitochondrial DNA Sequence of the Domestic Sheep (*Ovis aries*) and Comparison with the Other Major Ovine Haplotype. *J Mol Evol* **1998**, *47*, 441–448. DOI: 10.1007/PL00006401
